# Supplementary material for: Effect of Cellulose and Cellulose Nanocrystal Contents on the Biodegradation, under Composting Conditions, of Hierarchical PLA Biocomposites
Source: MDPI journal article supplement (doi:10.3390/polym13111855), 2021-06-02
Supplement: s1 [file s1]

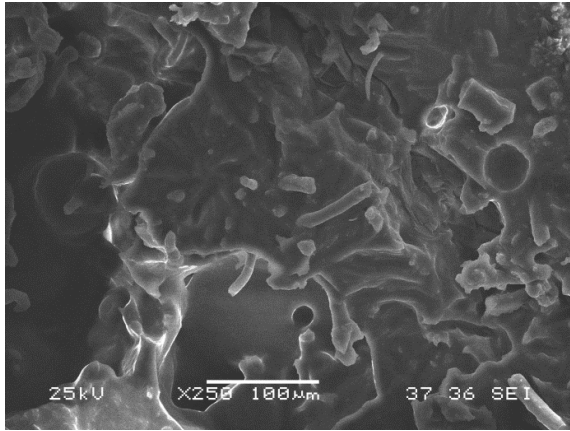

(a)

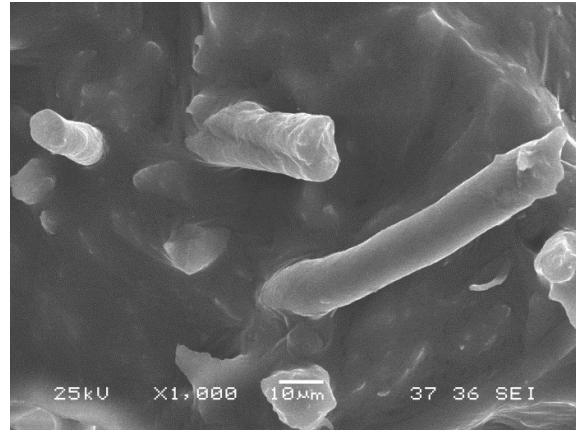

(b)

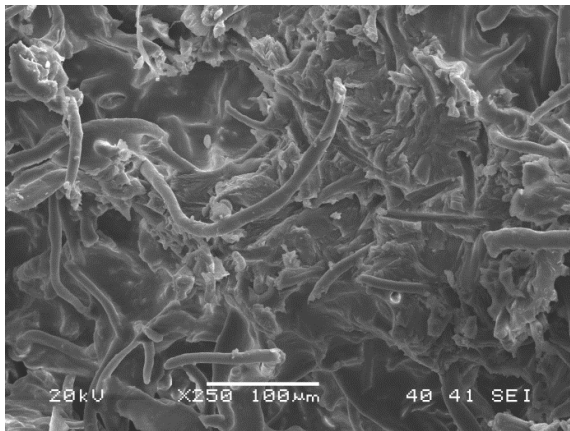

(c)

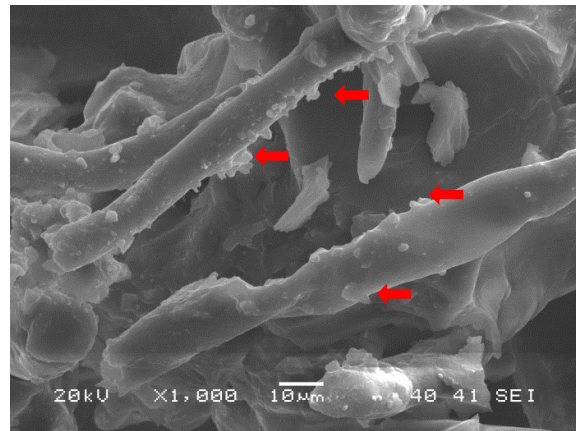

(d)

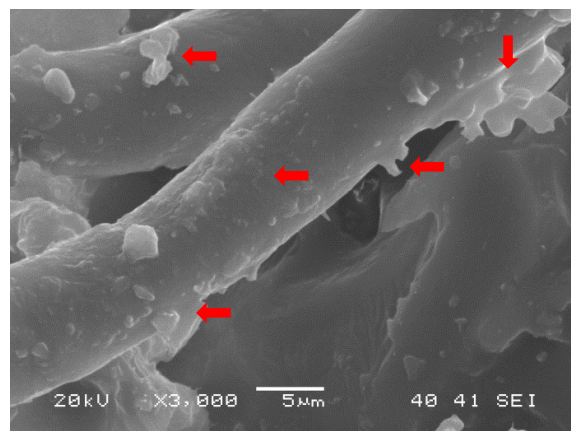

(e)

Figure S1. Fracture surface Sem micrographs of HBC2 (a-b) and HBC4 (c-e) before composting

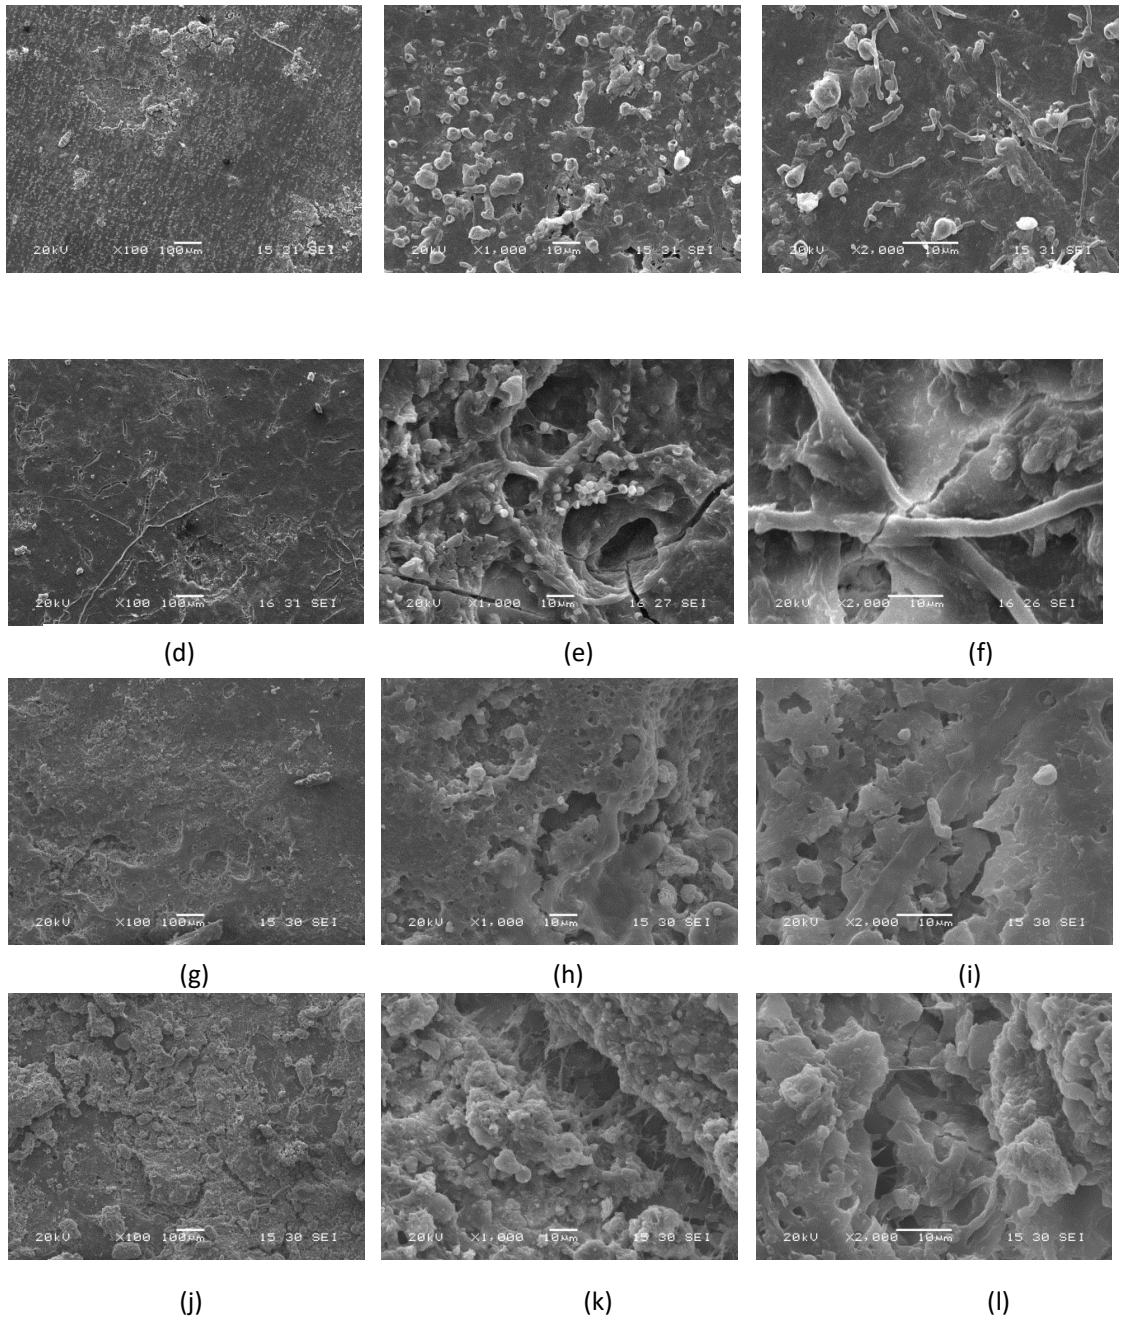

Figura S2. Sem micrographs at different resolutions for HBC1 (a-c); HBC2 (d-f); HBC3 (g-i) and HBC4 (j-l) after 180 composting days.
